# Supplementary material for: Synergistic catalysis of nano-Pd and nano rare-earth oxide/AC: complex nanostructured catalysts fabricated by a photochemical route for selective hydrogenation of phenol
Source: Royal Society of Chemistry journal article supplement (doi:10.1039/c7ra09917g), 2017-01-01
Supplement: c7ra09917g1.pdf [file c7ra09917g1.pdf]

## Supporting information

### Synergistic Catalysis of nano-Pd and nano rare-earth oxide/AC:Complex nanostructured catalysts fabricated by photochemical route for selective hydrogenation of phenol

Yanji Zhang, Jicheng Zhou\*, Jiaqi Si,

\* College of Chemical Engineering, Xiangtan University, Xiangtan 411105, China;

**The conversion and selectivity are defined as follows:**

$$\text{Conversion of phenol (\%)} = \frac{\text{Moles of phenol converted}}{\text{Moles of phenol initially added}} \times 100\%$$

$$\text{Selectivity to cyclohexanone (\%)} = \frac{\text{Moles of cyclohexanone}}{\text{Moles of phenol converted}} \times 100\%$$

**The products were analyzed using an Agilent 6890N GC**

(a)

dichloromethane

chlorobenzene

cyclohexanol

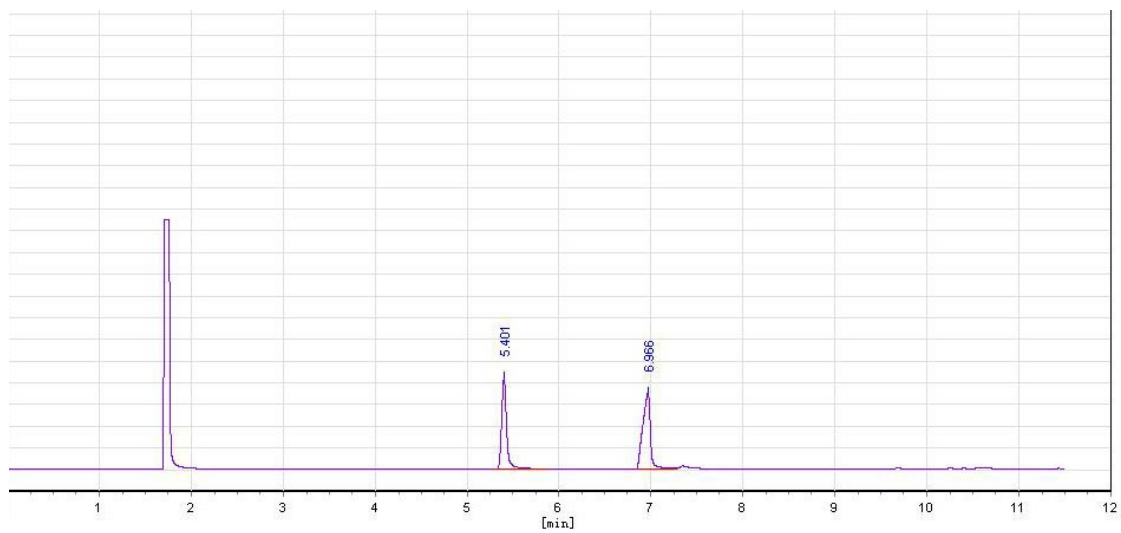

(b)

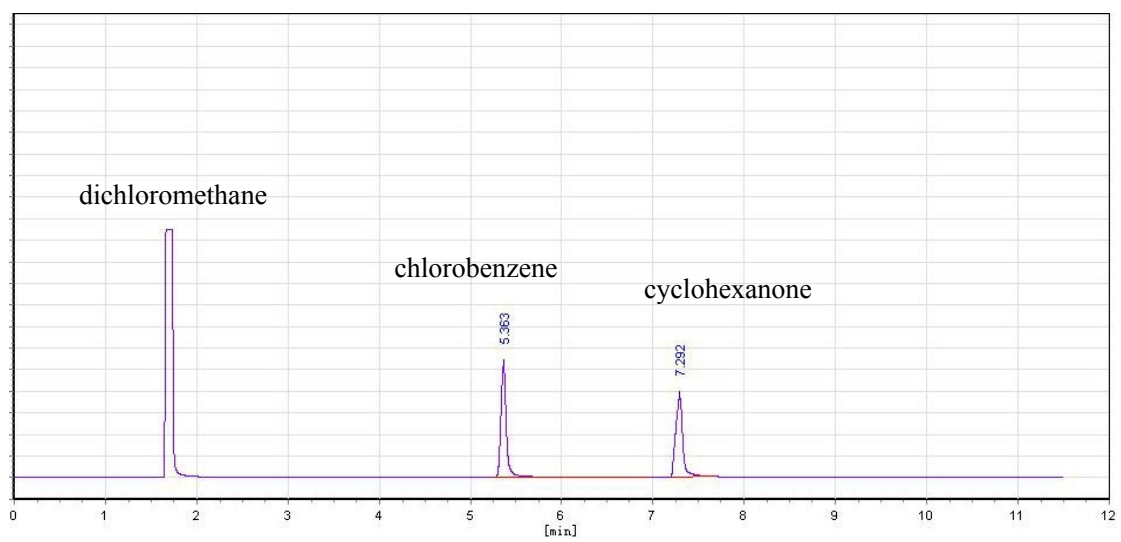

(c)

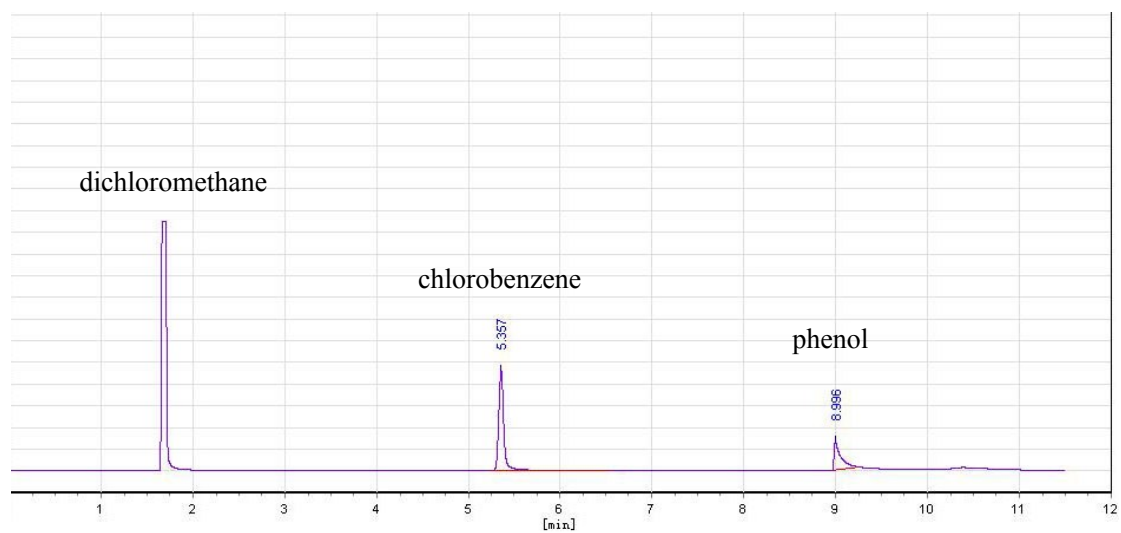

(d)

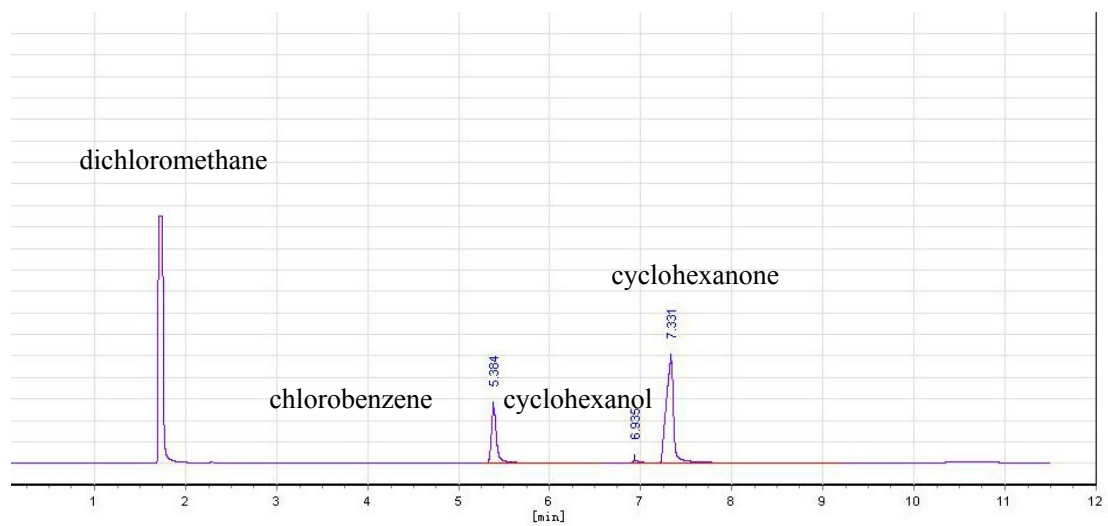

Figure S1. The GC traces of the samples: (a) cyclohexanol; (b) cyclohexanone; (c) phenol; (d) Table 2 entry 15.
